# Supplementary material
Source: PubMed Central journal article supplement (PMC3763871)
Supplement: NIHMS455579-supplement-Supplementary.pdf [file NIHMS455579-supplement-Supplementary.pdf]

# Web-based Supplementary Materials for “Bayesian Semiparametric Regression Models for Evaluating Pathway Effects on Continuous and Binary Clinical Outcomes”

Inyoung Kim<sup>1,\*</sup>, Herbert Pang<sup>2</sup>, and Hongyu Zhao<sup>3,4</sup>

1 Department of Statistics, Virginia Polytechnic Institute and State University, Blacksburg, VA 24061, USA.

2 Department of Biostatistics and Bioinformatics, Duke University School of Medicine, Durham, NC 27705, USA.

3 Department of Epidemiology and Public Health, Yale University School of Medicine, New Haven, CT 06520, USA.

4 Department of Genetics, Yale University School of Medicine, New Haven, CT 06520, USA.

\*To whom correspondence should be addressed:

Inyoung Kim, Ph.D

Department of Statistics, Virginia Tech., Blacksburg, VA 24061, USA.

Tel: (540) 231-5366

Fax: (540) 231-3863

E-Mail: [inyoungk@vt.edu](mailto:inyoungk@vt.edu)

## A Non-identifiability between $\tau$ and $\rho$ when $\rho \rightarrow 0$

If  $\tau \sim O(\frac{1}{\rho^m})$  for any positive value  $m$  and  $\rho \sim O\{E(\|z - z'\|^2)\}$ , Liu's estimator  $\hat{\Theta}$  is asymptotically normally distributed with mean  $\Theta$  and covariance matrix  $I(\Theta)$ , where

$$I_{\theta_l, \theta_{l'}} = \frac{1}{2} \text{tr}\{P\Sigma_{\theta_l}P\Sigma_{\theta_{l'}}\}.$$

Define some notations

$$\begin{aligned}\Sigma &= \sigma^2 I + \tau \mathbf{K} \\ P &= \Sigma^{-1} - \Sigma^{-1} X (X' \Sigma^{-1} X)^{-1} X' \Sigma^{-1}\end{aligned}$$

and  $\Sigma_{\theta_l}$  are the first derivative of  $\Sigma$  with respect to  $\theta_l$ . Further define  $P_\tau$  and  $P_{\tau, \tau}$  are the first and second derivatives of  $P$  with respect to  $\tau$ . Other notations are similarly defined.

Based on this setting, if  $\rho \rightarrow 0$ ,  $P_\tau = P_{\tau\tau} = 0$  and  $P_\rho = P_{\rho\rho} = 0$ , then the asymptotic distributions of  $\hat{\tau}$  and  $\hat{\rho}$  are the same and degenerated.

## B The proof of equivalence of the two testings

The testing of  $H_0: \{\mathbf{r}(\mathbf{z}) \text{ is a point mass at zero}\} \cup \{\mathbf{r}(\mathbf{z}) \text{ has a constant covariance matrix as a function of } \mathbf{z}\}$  is equivalent to the testing of  $\frac{\partial \mathbf{K}(\mathbf{Z})}{\partial \mathbf{Z}} = \mathbf{0}$ .

$$\begin{aligned}K_{ij}(\mathbf{z}_i, \mathbf{z}_j) &= \tau \exp\left(-\frac{\|\mathbf{z}_i - \mathbf{z}_j\|^2}{\rho}\right) \\ \frac{\partial K_{ij}(\mathbf{z}_i, \mathbf{z}_j)}{\partial \mathbf{z}_i} &= -2(\|\mathbf{z}_i - \mathbf{z}_j\|) \left(\frac{\tau}{\rho}\right) \exp\left(-\frac{\|\mathbf{z}_i - \mathbf{z}_j\|^2}{\rho}\right)\end{aligned}$$

If  $\rho \rightarrow 0$  and  $\tau \rightarrow 0$  with faster rate  $O(\rho^m)$ , then  $\frac{\partial \mathbf{K}(\mathbf{Z})}{\partial \mathbf{Z}} = \mathbf{0}$ . That is, if  $\frac{\tau}{\rho} \rightarrow 0$ , then  $\frac{\partial \mathbf{K}(\mathbf{Z})}{\partial \mathbf{Z}} = \mathbf{0}$ .

If  $\rho \rightarrow \infty$ , then  $0 \leq \exp(-\frac{\|\mathbf{z}_i - \mathbf{z}_j\|^2}{\rho}) \leq 1$ . Therefore,  $0 \leq \frac{\tau}{\rho} \exp(-\frac{\|\mathbf{z}_i - \mathbf{z}_j\|^2}{\rho}) \leq \frac{\tau}{\rho}$ .

Hence, if  $\frac{\tau}{\rho} \rightarrow 0$ ,  $\frac{\partial \mathbf{K}(\mathbf{Z})}{\partial \mathbf{Z}} = \mathbf{0}$ .

If  $\rho \rightarrow 0$  and  $\tau \sim O(\frac{1}{\rho^m})$ , then  $\exp(-\frac{\|\mathbf{z}_i - \mathbf{z}_j\|^2}{\rho}) \rightarrow 0$ . Therefore,  $\frac{\partial \mathbf{K}(\mathbf{Z})}{\partial \mathbf{Z}} = \mathbf{0}$ .

Therefore, if  $\frac{\tau}{\rho} \rightarrow 0$  or  $\rho \rightarrow 0$ , then  $\frac{\partial \mathbf{K}(\mathbf{Z})}{\partial \mathbf{Z}} = \mathbf{0}$ .

| Kernel(K) |        |   | GK             | BHM           | BHM<br>(BF)   |
|-----------|--------|---|----------------|---------------|---------------|
|           | Case   |   |                |               |               |
| $n = 60$  | Type I | 0 | 0.04 (0.00003) | 0.04(0.00003) | 0.05(0.00003) |
| $p = 5$   | Power  | 1 | 0.99 (0.00001) | 0.99(0.00001) | 1(0.00001)    |
|           |        | 2 | 0.90 (0.00003) | 0.94(0.00003) | 0.97(0.00002) |
|           |        | 3 | 0.86 (0.00004) | 0.89(0.00004) | 0.91(0.00003) |
|           |        | 4 | 0.84 (0.00004) | 0.86(0.00004) | 0.89(0.00002) |
|           |        | 5 | 0.77 (0.00004) | 0.78(0.00004) | 0.81(0.00004) |
| $n = 60$  | Type I | 0 | 0.03 (0.00003) | 0.03(0.00003) | 0.04(0.00003) |
| $p = 200$ | Power  | 1 | 0.84 (0.00003) | 0.85(0.00003) | 0.89(0.00003) |
|           |        | 2 | 0.81 (0.00004) | 0.82(0.00004) | 0.87(0.00003) |
|           |        | 3 | 0.77 (0.00004) | 0.79(0.00004) | 0.81(0.00004) |
|           |        | 4 | 0.73 (0.00005) | 0.73(0.00005) | 0.77(0.00005) |
|           |        | 5 | 0.72 (0.00005) | 0.73(0.00005) | 0.76(0.00005) |

Table 1: Estimated type I error rate and power on a continuous clinical outcome. The number within parenthesis is standard deviation. LIKE=LLG’s likelihood-based approach with kernel  $K$  using a resampling based inference; BHM=Bayesian approach on hierarchical model using a resampling based inference; BHM(BF)=Bayesian approach on hierarchical model using a inference based on Bayes factor; GK=Gaussian kernel.

|               |          | Kernel | Method | Simulation model |        |        |        |        |
|---------------|----------|--------|--------|------------------|--------|--------|--------|--------|
| Parameters    |          | K      |        | Case 0           | Case 1 | Case 2 | Case 3 | Case 4 |
| n=60<br>p=5   | $\beta$  | GK     | LIKE   | 0.99             | 0.99   | 1.01   | 1.01   | 0.99   |
|               | $\sigma$ |        |        | 0.93             | 1.07   | 1.26   | 0.94   | 0.92   |
|               | $\tau$   |        |        | 0.24             | 227.65 | 1.34   | 5.67   | 1.12   |
|               | $\rho$   |        |        | 0.79             | 4.10   | 1.22   | 2.33   | 1.53   |
|               | $R^2$    |        |        | 0.02             | 0.99   | 0.95   | 0.87   | 0.91   |
|               | $\beta$  | GK     | BHM    | 1.01             | 0.99   | 0.99   | 0.99   | 0.99   |
|               | $\sigma$ |        |        | 0.85             | 1.05   | 0.99   | 0.96   | 0.94   |
|               | $\tau$   |        |        | 0.37             | 240.29 | 1.22   | 4.67   | 1.76   |
|               | $\rho$   |        |        | 0.99             | 4.30   | 1.31   | 2.86   | 0.95   |
|               | $R^2$    |        |        | 0.02             | 0.98   | 0.98   | 0.89   | 0.93   |
| n=60<br>p=200 | $\beta$  | GK     | LIKE   | 1.00             | 2.98   | 1.00   | 1.54   | 1.17   |
|               | $\sigma$ |        |        | 0.31             | 2.23   | 1.00   | 2.04   | 4.13   |
|               | $\tau$   |        |        | 0.92             | 5.81   | 1.020  | 4.18   | 2.72   |
|               | $\rho$   |        |        | 1.79             | 0.35   | 1.01   | 0.06   | 0.12   |
|               | $R^2$    |        |        | 0.03             | 0.85   | 0.82   | 0.77   | 0.74   |
|               | $\beta$  | GK     | BHM    | 1.01             | 2.79   | 1.00   | 1.87   | 1.01   |
|               | $\sigma$ |        |        | 0.48             | 2.37   | 0.99   | 2.40   | 3.98   |
|               | $\tau$   |        |        | 0.94             | 6.07   | 1.02   | 4.38   | 2.60   |
|               | $\rho$   |        |        | 1.29             | 0.35   | 1.02   | 0.06   | 0.12   |
|               | $R^2$    |        |        | 0.02             | 0.87   | 0.83   | 0.80   | 0.74   |

Table 2: Average estimated parameter values on a continuous clinical outcome. LIKE=LLG's likelihood-based approach with kernel  $K$ ; BHM=Bayesian approach on hierarchical model with kernel  $K$ ; GK=Gaussian kernel.

|               |          | Kernel | Method | Simulation model |        |        |        |        |
|---------------|----------|--------|--------|------------------|--------|--------|--------|--------|
| Parameters    |          | K      |        | case 0           | Case 1 | Case 2 | Case 3 | Case 4 |
| n=60<br>p=5   | $\beta$  | P2K    | LIKE   | 1.98             | 1.01   | 1.00   | 0.99   | 1.01   |
|               | $\sigma$ |        |        | 1.07             | 1.06   | 1.03   | 0.99   | 0.99   |
|               | $\tau$   |        |        | 0.13             | 30.66  | 0.52   | 1.04   | 0.41   |
|               | $\rho$   |        |        | N/A              | N/A    | N/A    | N/A    | N/A    |
|               | $R^2$    |        |        | 0.016            | 0.90   | 0.80   | 0.91   | 0.94   |
|               | $\beta$  | P2K    | BHM    | 1.25             | 0.99   | 1.02   | 1.01   | 0.97   |
|               | $\sigma$ |        |        | 1.07             | 1.04   | 1.05   | 0.99   | 1.01   |
|               | $\tau$   |        |        | 0.14             | 29.71  | 0.45   | 0.93   | 1.08   |
|               | $\rho$   |        |        | N/A              | N/A    | N/A    | N/A    | N/A    |
|               | $R^2$    |        |        | 0.015            | 0.91   | 0.81   | 0.92   | 0.95   |
| n=60<br>n=200 | $\beta$  | P2K    | LIKE   | 1.09             | 1.02   | 0.94   | 1.03   | 1.01   |
|               | $\sigma$ |        |        | 1.19             | 1.20   | 1.24   | 2.48   | 1.21   |
|               | $\tau$   |        |        | 0.01             | 1.01   | 0.49   | 0.96   | 0.50   |
|               | $\rho$   |        |        | N/A              | N/A    | N/A    | N/A    | N/A    |
|               | $R^2$    |        |        | 0.023            | 0.88   | 0.77   | 0.81   | 0.66   |
|               | $\beta$  | P2K    | BHM    | 0.97             | 1.05   | 1.00   | 0.97   | 0.99   |
|               | $\sigma$ |        |        | 1.19             | 1.20   | 1.06   | 2.17   | 1.22   |
|               | $\tau$   |        |        | 0.01             | 1.01   | 0.86   | 1.21   | 0.53   |
|               | $\rho$   |        |        | N/A              | N/A    | N/A    | N/A    | N/A    |
|               | $R^2$    |        |        | 0.02             | 0.89   | 0.77   | 0.81   | 0.66   |

Table 3: Average estimated parameter values on a continuous clinical outcome. LIKE=LLG's likelihood-based approach with kernel  $K$ ; BHM=Bayesian approach on hierarchical model with kernel  $K$ ; P2K=Quadratic kernel.

|               |          | Kernel | Method | Simulation model |        |        |       |        |
|---------------|----------|--------|--------|------------------|--------|--------|-------|--------|
| Parameters    |          | K      |        | Case 0           | Case 1 | Case 2 | Case3 | Case 4 |
| n=60<br>p=5   | $\beta$  | P1K    | LIKE   | 0.95             | 1.09   | 1.01   | 0.99  | 1.01   |
|               | $\sigma$ |        |        | 0.98             | 2.32   | 1.11   | 1.07  | 1.00   |
|               | $\tau$   |        |        | 0.17             | 65.19  | 0.94   | 4.28  | 1.18   |
|               | $\rho$   |        |        | N/A              | N/A    | N/A    | N/A   | N/A    |
|               | $R^2$    |        |        | 0.01             | 0.87   | 0.72   | 0.91  | 0.92   |
|               | $\beta$  | P1K    | BHM    | 1.02             | 0.9908 | 0.99   | 0.99  | 1.01   |
|               | $\sigma$ |        |        | 1.00             | 2.3109 | 1.07   | 1.08  | 0.99   |
|               | $\tau$   |        |        | 0.21             | 64.07  | 0.95   | 4.84  | 1.01   |
|               | $\rho$   |        |        | N/A              | N/A    | N/A    | N/A   | N/A    |
|               | $R^2$    |        |        | 0.01             | 0.87   | 0.74   | 0.92  | 0.93   |
| n=60<br>p=200 | $\beta$  | P1K    | LIKE   | 1.25             | 0.92   | 1.07   | 0.94  | 1.04   |
|               | $\sigma$ |        |        | 1.22             | 1.69   | 1.35   | 2.03  | 1.55   |
|               | $\tau$   |        |        | 0.28             | 1.59   | 0.36   | 0.76  | 0.91   |
|               | $\rho$   |        |        | N/A              | N/A    | N/A    | N/A   | N/A    |
|               | $R^2$    |        |        | 0.02             | 0.84   | 0.60   | 0.78  | 0.82   |
|               | $\beta$  | P1K    | BHM    | 0.91             | 0.92   | 1.01   | 1.34  | 0.98   |
|               | $\sigma$ |        |        | 1.18             | 1.68   | 1.32   | 2.78  | 1.39   |
|               | $\tau$   |        |        | 0.25             | 1.47   | 0.35   | 0.89  | 0.89   |
|               | $\rho$   |        |        | N/A              | N/A    | N/A    | N/A   | N/A    |
|               | $R^2$    |        |        | 0.02             | 0.84   | 0.61   | 0.79  | 0.82   |

Table 4: Average estimated parameter values on a continuous clinical outcome. LIKE=LLG's likelihood-based approach with kernel  $K$ ; BHM=Bayesian approach on hierarchical model with kernel  $K$ ; P1K=Linear kernel

| Kernel(K) |        |   | GK              |                |                |
|-----------|--------|---|-----------------|----------------|----------------|
|           |        |   | LIKE            | BHM            | BHM<br>(BF)    |
| Case      |        |   |                 |                |                |
| $n = 60$  | Type I | 6 | 0.04 (0.00002)  | 0.044(0.00002) | 0.053(0.00002) |
| $p = 5$   | Power  | 7 | 1 (0.00001)     | 1(0.00001)     | 1(0.00001)     |
|           |        | 8 | 0.92 (0.00003)  | 0.95(0.00003)  | 1(0.00002)     |
|           |        | 9 | 0.78 (0.00003)  | 0.78(0.00003)  | 0.82(0.00002)  |
| $n = 60$  | Type I | 6 | 0.037 (0.00003) | 0.037(0.00003) | 0.042(0.00003) |
| $p = 200$ | Power  | 7 | 0.85 (0.00003)  | 0.86(0.00003)  | 0.89(0.00003)  |
|           |        | 8 | 0.82 (0.00003)  | 0.82(0.00003)  | 0.87(0.00003)  |
|           |        | 9 | 0.73 (0.00005)  | 0.73(0.00005)  | 0.77(0.00005)  |

Table 5: Estimated type I error rate and power on a binary outcome. The number within parenthesis are standard error. LIKE=LLG’s likelihood-based approach with kernel  $K$  using a resampling based inference; BMLM=Bayesian approach on hierarchical latent model with kernel  $K$  using a resampling based inference; BMLM(BF)=Bayesian approach on hierarchical latent model using Bayes Factor; GK=Gaussian kernel.



|     |     | BHM(BF) |      |      |      |
|-----|-----|---------|------|------|------|
|     |     | GK      | P1K  | P2K  | NNK  |
| LLG | GK  | 0.39    |      |      |      |
|     | P1K |         | 0.46 |      |      |
|     | P2K |         |      | 0.46 |      |
|     | NNK |         |      |      | 0.34 |

Table 6: The proportions of overlap between the Bayesian inference based Bayes factor and resampling based inference: we selected the top 50 pathways from the Bayesian approach and the likelihood based approach for each kernel. LLG=Liu et al’s likelihood-based approach with kernel  $K$  using a resampling based inference; BHM(BF)=Bayesian approach on hierarchical model using Bayes Factor; GK=Gaussian kernel; P1K=Linear kernel; P2K=Quadratic kernel; NNK=Neural Network kernel.

|        | GSEA | BHM(BF) |      |      |      |
|--------|------|---------|------|------|------|
|        |      | P1K     | P2K  | GK   | NNK  |
| Global | 0.36 | 0.42    | 0.42 | 0.12 | 0.4  |
| GSEA   |      | 0.43    | 0.41 | 0.22 | 0.28 |

Table 7: The proportions of overlap among Global, GSEA, and the Bayesian inference based Bayes factor: we selected the top 50 pathways from each method. BHM(BF)=Bayesian approach on hierarchical model using Bayes Factor; GK=Gaussian kernel; P1K=Linear kernel; P2K=Quadratic kernel; NNK=Neural Network kernel. Global=global test by Goeman *et al.* (2004); GSEA=Gene Set Enrichment Analysis by Subramanian *et al.* (2005).

| Gene Id     | Gene Name | Gene Id     | Gene Name | $\frac{1}{S} \sum_{s=1}^S  \hat{\tau}_{Bay,-(g,g')}^b - \hat{\tau} $ | $\frac{1}{B} \sum_{s=1}^S  \hat{\rho}_{Bay,-(g,g')}^s - \hat{\rho} $ | $\frac{1}{S} \sum_{s=1}^S  (\frac{\hat{\tau}}{\hat{\rho}})^s_{Bay,-(g,g')} - (\frac{\hat{\tau}}{\hat{\rho}}) $ |
|-------------|-----------|-------------|-----------|----------------------------------------------------------------------|----------------------------------------------------------------------|----------------------------------------------------------------------------------------------------------------|
| 205963_s_at | DNAJA3    | 215000_s_at | FEZ2      | 42.55                                                                | 1.13                                                                 | 32.11                                                                                                          |
| 208903_at   | RPS28     | 217852_s_at | SBNO1     | 39.57                                                                | 2.53                                                                 | 53.99                                                                                                          |
| 203312_x_at | ARF6      | 218188_s_at | RPS5P1    | 32.69                                                                | 1.13                                                                 | 40.76                                                                                                          |
| 211999_at   | H3F3B     | 217150_s_at | NF2       | 31.38                                                                | 0.26                                                                 | 51.29                                                                                                          |
| 205679_x_at | AGC1      | 220966_x_at | ARPC5L    | 31.35                                                                | 3.28                                                                 | 60.07                                                                                                          |
| 201739_at   | SGK       | 204746_s_at | PRKCABP   | 30.08                                                                | 0.99                                                                 | 39.49                                                                                                          |
| 207152_at   | NTRK2     | 211998_at   | H3F3B     | 29.69                                                                | 3.86                                                                 | 61.95                                                                                                          |
| 210835_s_at | CTBP2     | 218188_s_at | RPS5P1    | 28.14                                                                | 3.33                                                                 | 61.18                                                                                                          |
| 203138_at   | HAT1      | 210835_s_at | CTBP2     | 26.62                                                                | 0.99                                                                 | 42.96                                                                                                          |
| 212397_at   | RDX       | 215000_s_at | FEZ2      | 26.29                                                                | 1.13                                                                 | 46.43                                                                                                          |
| 203312_x_at | ARF6      | 211998_at   | H3F3B     | 24.13                                                                | 3.03                                                                 | 61.68                                                                                                          |
| 215148_s_at | RAB3D     | 218188_s_at | RPS5P1    | 23.56                                                                | 1.13                                                                 | 48.82                                                                                                          |
| 201475_x_at | MARS      | 212397_at   | RDX       | 22.41                                                                | 1.24                                                                 | 51.54                                                                                                          |
| 201739_at   | SGK       | 32699_s_at  | PVR       | 22.09                                                                | 0.83                                                                 | 43.03                                                                                                          |
| 210330_at   | SGCD      | 218869_at   | MLYCD     | 17.61                                                                | 1.29                                                                 | 55.99                                                                                                          |
| 201218_at   | CTBP2     | 214443_at   | PVR       | 17.31                                                                | 1.48                                                                 | 57.95                                                                                                          |
| 202569_s_at | MARK3     | 205679_x_at | AGC1      | 16.20                                                                | 1.69                                                                 | 60.00                                                                                                          |
| 201170_s_at | BHLHB2    | 218869_at   | MLYCD     | 15.89                                                                | 0.89                                                                 | 51.93                                                                                                          |
| 203311_s_at | ARF6      | 215489_x_at | HOMER3    | 15.29                                                                | 0.70                                                                 | 47.69                                                                                                          |
| 201170_s_at | BHLHB2    | 31807_at    | WDR5B     | 15.02                                                                | 1.13                                                                 | 56.34                                                                                                          |
| 209407_s_at | DEAF1     | 209736_at   | SOX13     | 14.69                                                                | 0.16                                                                 | 22.49                                                                                                          |
| 202569_s_at | MARK3     | 217852_s_at | SBNO1     | 14.35                                                                | 1.13                                                                 | 56.94                                                                                                          |
| 203149_at   | PVRL2     | 209199_s_at | MEF2C     | 13.82                                                                | 1.13                                                                 | 57.39                                                                                                          |
| 209341_s_at | IKBKB     | 218458_at   | GCL       | 13.58                                                                | 0.08                                                                 | 90.16                                                                                                          |
| 214182_at   | ARF6      | 214245_at   | RPS14     | 13.46                                                                | 1.14                                                                 | 57.75                                                                                                          |
| 201218_at   | CTBP2     | 201908_at   | DVL3      | 12.86                                                                | 1.13                                                                 | 58.26                                                                                                          |
| 207968_s_at | MEF2C     | 217780_at   | PTD008    | 12.48                                                                | 1.13                                                                 | 58.57                                                                                                          |
| 207968_s_at | MEF2C     | 221600_s_at | PTD012    | 12.46                                                                | 1.13                                                                 | 58.60                                                                                                          |
| 204746_s_at | PRKCABP   | 217269_s_at | RAB7      | 12.43                                                                | 0.65                                                                 | 50.46                                                                                                          |
| 202305_s_at | FEZ2      | 205698_s_at | MAP2K6    | 11.82                                                                | 1.13                                                                 | 59.16                                                                                                          |
| 207968_s_at | MEF2C     | 208645_s_at | RPS14     | 11.77                                                                | 1.13                                                                 | 59.20                                                                                                          |
| 203149_at   | PVRL2     | 207152_at   | NTRK2     | 11.69                                                                | 1.13                                                                 | 59.27                                                                                                          |
| 207152_at   | NTRK2     | 217150_s_at | NF2       | 11.55                                                                | 1.13                                                                 | 59.38                                                                                                          |

Table 8: Top gene pairs, within pathway 36 *c17-U133-probes*, ranked by the mean of the absolute values of the difference  $\frac{1}{S} \sum_{s=1}^S |\hat{\tau} - \hat{\tau}_{Bay,-(g,g')}^s|$ , where  $\hat{\tau}$  and  $\hat{\rho}$  are the mean of posterior samples obtained by fitting Bayesian hierarchical model (3) using the observed data and  $\hat{\tau}_{Bay,-(g,g')}^s$  and  $\hat{\rho}_{Bay,-(g,g')}^s$  are the  $s$ th posterior sample obtained by fitting Bayesian hierarchical model (3) after removing a gene pair  $g$  and  $g'$ .

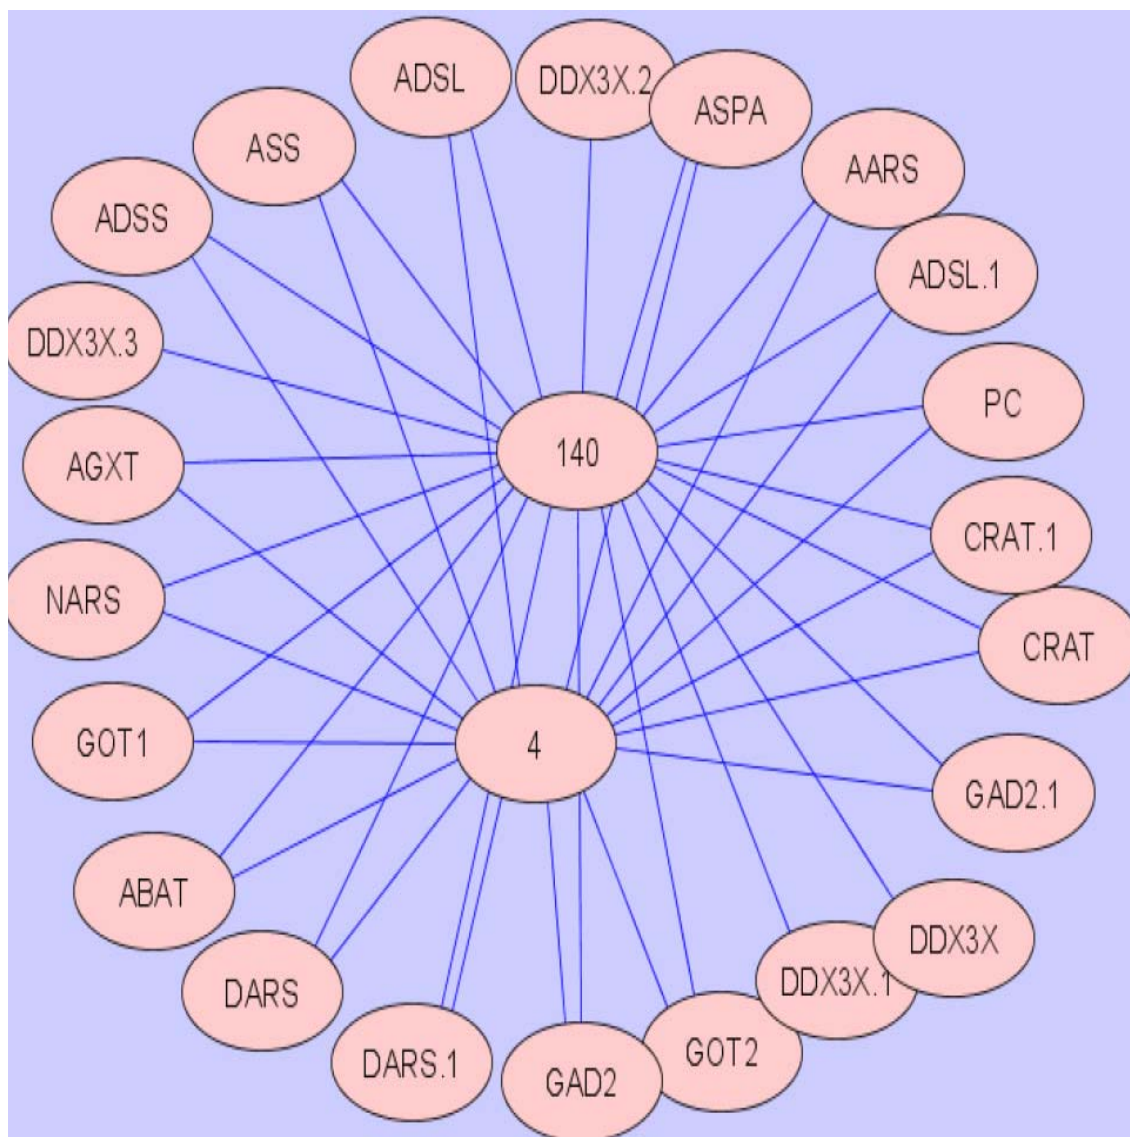

Figure 1: Common genes between pathway 4, *Alanine and aspartate metabolism*, and pathway 140, *MAP00252 Alanine and aspartate metabolism*.

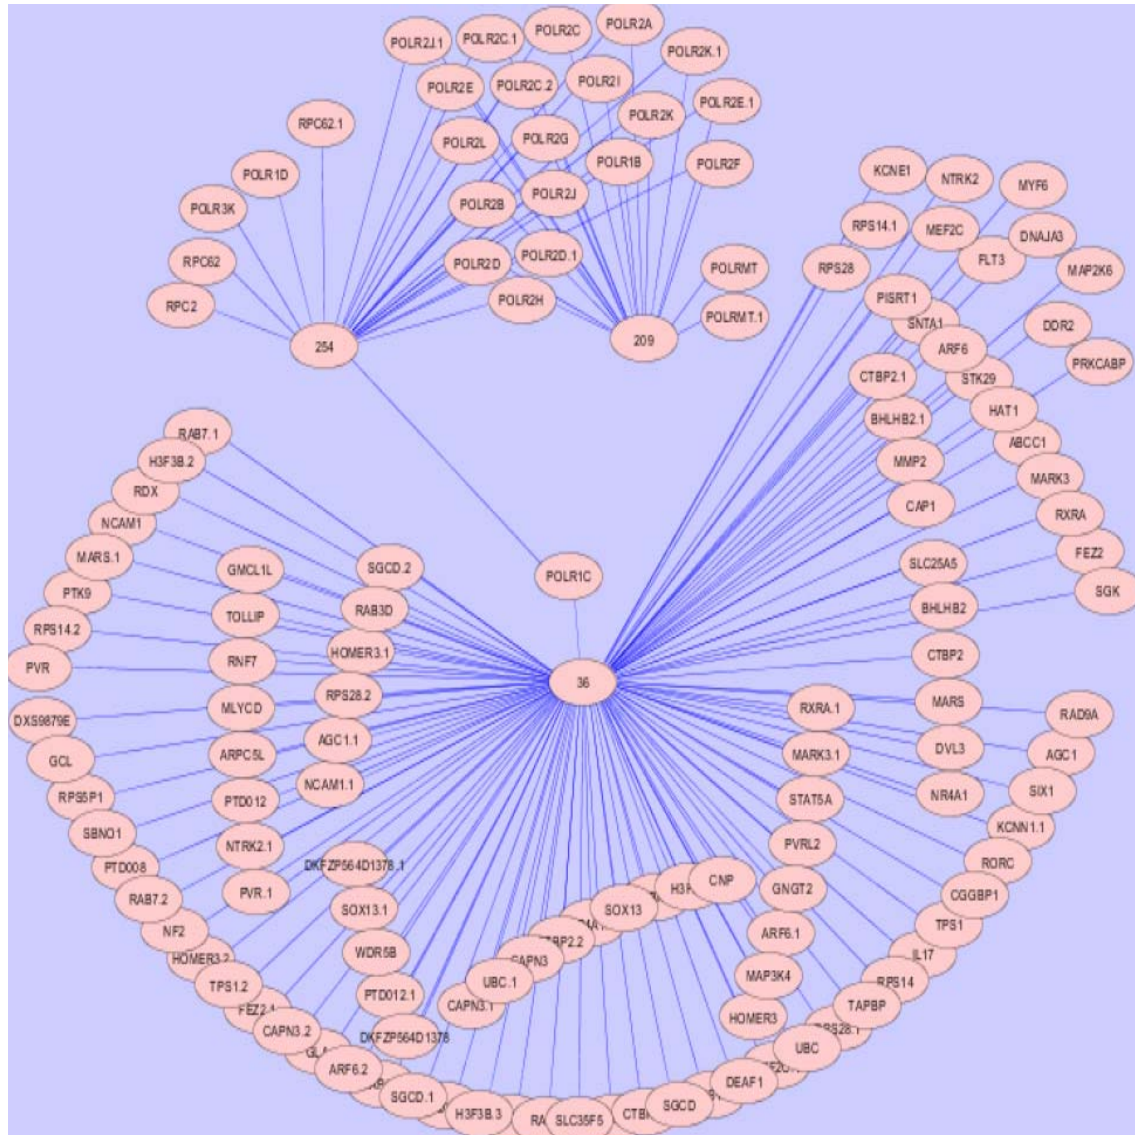

Figure 2: Common genes among pathway 36, *c17\_U133\_probes*, pathway 209, *MAP03020\_RNA\_polymerase*, pathway 254 *RNA polymerase*.
